# Supplementary material
Source: Springer Nature journal article supplement (https://www.springermedizin.de/resource/supplementary/12936_2008_668_MOESM2_ESM.pdf/9547960)

Kaplan-Meier survival estimates, by carriage

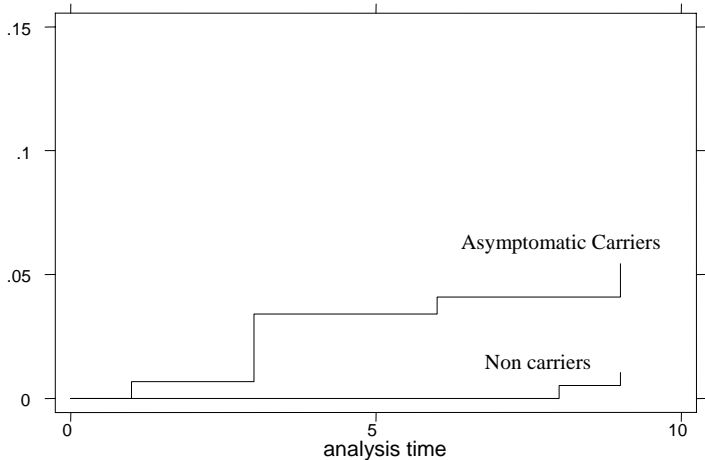

Supplement: MOESM2 [file 9547960]
